# Supplementary material for: Plausibility and redundancy analysis to select FDG‐PET textural features in non‐small cell lung cancer
Source: PubMed Central journal article supplement — Med Phys. 2021 Feb 6;48(3):1226–38. doi: 10.1002/mp.14684 (PMC7985880; doi:10.1002/mp.14684), 2021-02-06
Supplement: MP-48-1226-s001.pdf [file MP-48-1226-s001.pdf]

## Supplemental material

### Figure

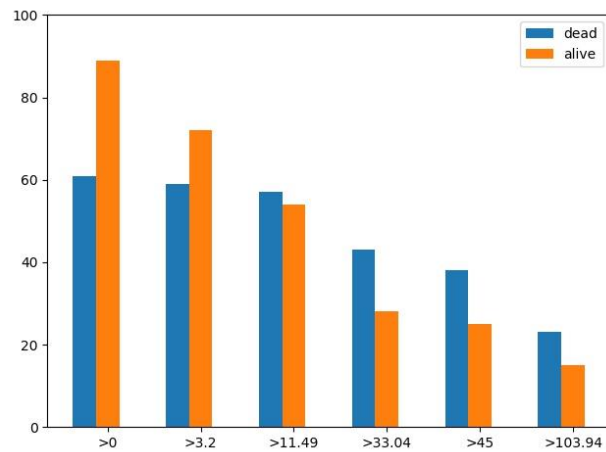

Supplemental Figure 1: Number of patients with positive/negative outcome (alive/dead) for different volume ranges

| Histology                |    | Smoking status                |    | Therapy                     |    |
|--------------------------|----|-------------------------------|----|-----------------------------|----|
| Adenocarcinoma           | 67 | Never smoked                  | 5  | Lobectomy                   | 25 |
| Spinocellulair carcinoma | 38 | Stopped more than 6 month ago | 64 | Lobectomy + Chemotherapy    | 18 |
| Oatcell carcinoma        | 18 | Active                        | 81 | Lobectomy + radiotherapy    | 8  |
| Large cell carcinoma     | 5  |                               |    | Palliative treatment        | 24 |
| Unknown                  | 23 |                               |    | No treatment                | 6  |
|                          |    |                               |    | Chemotherapy                | 41 |
|                          |    |                               |    | Chemotherapy + Radiotherapy | 25 |
|                          |    |                               |    | Radiotherapy                | 3  |

Supplemental Table 1: Additional patient characteristics

### Tables

Reproducible radiomic features

| Feature group            | Feature name            |
|--------------------------|-------------------------|
| Intensity volume feature | int_at_vol_fraction_10  |
| GLCM feature             | joint_maximum2Davg      |
| GLCM feature             | joint_entropy2Davg      |
| GLCM feature             | difference_average2Davg |

|               |                                            |
|---------------|--------------------------------------------|
| GLCM feature  | sum_entropy2Davg                           |
| GLCM feature  | contrast2Davg                              |
| GLCM feature  | dissimilarity2Davg                         |
| GLCM feature  | inverse_difference2Davg                    |
| GLCM feature  | inverse_difference_moment2Davg             |
| GLCM feature  | joint_maximum2Dmrg                         |
| GLCM feature  | joint_entropy2Dmrg                         |
| GLCM feature  | difference_average2Dmrg                    |
| GLCM feature  | difference_variance2Dmrg                   |
| GLCM feature  | difference_entropy2Dmrg                    |
| GLCM feature  | sum_entropy2Dmrg                           |
| GLCM feature  | contrast2Dmrg                              |
| GLCM feature  | dissimilarity2Dmrg                         |
| GLCM feature  | inverse_difference2Dmrg                    |
| GLCM feature  | inverse_difference_moment2Dmrg             |
| GLCM feature  | joint_average2Dvmrg                        |
| GLCM feature  | difference_average2Dvmrg                   |
| GLCM feature  | difference_variance2Dvmrg                  |
| GLCM feature  | sum_average2Dvmrg                          |
| GLCM feature  | contrast2Dvmrg                             |
| GLCM feature  | dissimilarity2Dvmrg                        |
| GLCM feature  | joint_average3Davg                         |
| GLCM feature  | sum_average3Davg                           |
| GLCM feature  | inverse_variance3Davg                      |
| GLCM feature  | joint_average3Dwmrg                        |
| GLCM feature  | sum_average3Dwmrg                          |
| GLCM feature  | inverse_variance3Dwmrg                     |
| GLRLM feature | short_run_emphasis2Davg                    |
| GLRLM feature | long_runs_emphasis2Davg                    |
| GLRLM feature | Grey_level_non_uniformity2Davg             |
| GLRLM feature | Run_length_non_uniformity2Davg             |
| GLRLM feature | Run_length_non_uniformity_normalized2Davg  |
| GLRLM feature | Run_percentage2Davg                        |
| GLRLM feature | Run_entropy2Davg                           |
| GLRLM feature | short_run_emphasis2Dwmrg                   |
| GLRLM feature | Grey_level_non_uniformity2Dwmrg            |
| GLRLM feature | Run_length_non_uniformity2Dwmrg            |
| GLRLM feature | Run_length_non_uniformity_normalized2Dwmrg |
| GLRLM feature | Run_percentage2Dwmrg                       |
| GLRLM feature | Grey_level_non_uniformity2Dvmrg            |
| GLRLM feature | Run_length_non_uniformity2Dvmrg            |
| GLRLM feature | Run_length_variance2Dvmrg                  |
| GLRLM feature | Run_entropy2Dvmrg                          |
| GLRLM feature | Low_grey_level_run_emphasis3Davg           |
| GLRLM feature | Short_run_low_grey_level_emphasis3Davg     |

|               |                                                    |
|---------------|----------------------------------------------------|
| GLRLM feature | Grey_level_non_uniformity3Davg                     |
| GLRLM feature | Run_length_non_uniformity3Davg                     |
| GLRLM feature | Low_grey_level_run_emphasis3Dmrg                   |
| GLRLM feature | Short_run_low_grey_level_emphasis3Dmrg             |
| GLRLM feature | Grey_level_non_uniformity3Dmrg                     |
| GLRLM feature | Run_length_non_uniformity3Dmrg                     |
| GLSZM feature | small_zone_emphasis2Davg                           |
| GLSZM feature | Grey_level_non_uniformity_GLSZM2Davg               |
| GLSZM feature | Zone_size_non_uniformity_normalized2Davg           |
| GLSZM feature | Zone_percentage_GLSZM2Davg                         |
| GLSZM feature | Zone_size_entropy2Davg                             |
| GLSZM feature | Grey_level_non_uniformity_GLSZM2Dvmrg              |
| GLSZM feature | Zone_size_non_uniformity_normalized2Dvmrg          |
| GLSZM feature | Large_zone_high_grey_level_emphasis3D              |
| GLSZM feature | Grey_level_non_uniformity_GLSZM3D                  |
| NGTDM feature | coarseness2Dmrg                                    |
| NGTDM feature | contrast2Dmrg                                      |
| NGTDM feature | coarseness3D                                       |
| GLDZM feature | small_distance_emphasis_GLDZM2Davg                 |
| GLDZM feature | Grey_level_non_uniformity_GLDZM2Davg               |
| GLDZM feature | Zone_distance_non_uniformity_GLDZM2Davg            |
| GLDZM feature | Zone_distance_non_uniformity_normalized_GLDZM2Davg |
| GLDZM feature | Zone_percentage_GLDZM2Davg                         |
| GLDZM feature | Grey_level_non_uniformity_GLDZM2Dmrg               |
| GLDZM feature | Zone_distance_non_uniformity_GLDZM2Dmrg            |
| GLDZM feature | Grey_level_non_uniformity_GLDZM3D                  |
| NGLDM feature | Low_dependence_emphasis2Davg                       |
| NGLDM feature | Grey_level_non_uniformity2Davg                     |
| NGLDM feature | Dependence_count_non_uniformity2Davg               |
| NGLDM feature | Dependence_count_entropy2Davg                      |
| NGLDM feature | Low_dependence_emphasis2Dmrg                       |
| NGLDM feature | Low_dependence_high_grey_level_emphasis2Dmrg       |
| NGLDM feature | Grey_level_non_uniformity2Dmrg                     |
| NGLDM feature | Dependence_count_non_uniformity2Dmrg               |
| NGLDM feature | Dependence_count_percentage2Dmrg                   |
| NGLDM feature | Grey_level_non_uniformity3Dmrg                     |

**Table 2: Abbreviations: GLCM: Grey level co-occurrence. GLRLM: Grey-Level-Run-Length Matrix. GLSZM: Grey-Level-Size Zone Matrix. GLDZM: Grey-Level-Distance-Zone-Matrix. NGLDM: Neighborhood Grey Level Dependence Matrix**

| Feature name        | Correlation with MATV | Correlation with SUVMEAN | Correlation with SUVPEAK |
|---------------------|-----------------------|--------------------------|--------------------------|
| joint_average2Dvmrg | 0.43                  | 0.99                     | 0.93                     |
| sum_average2Dvmrg   | 0.43                  | 0.99                     | 0.93                     |
| joint_average3Davg  | 0.43                  | 0.99                     | 0.93                     |

|                                              |             |             |             |
|----------------------------------------------|-------------|-------------|-------------|
| sum_average3Davg                             | 0.43        | 0.99        | 0.93        |
| joint_average3DWmrg                          | 0.43        | 0.99        | 0.93        |
| sum_average3DWmrg                            | 0.43        | 0.99        | 0.93        |
| <b>Grey_level_non_uniformity2Davg</b>        | <b>0.86</b> | <b>0.06</b> | <b>0.24</b> |
| <b>Grey_level_non_uniformity2DWmrg</b>       | <b>0.86</b> | <b>0.06</b> | <b>0.24</b> |
| Grey_level_non_uniformity2Dvmrg              | 0.94        | 0.18        | 0.37        |
| Run_entropy2Dvmrg                            | 0.60        | 0.96        | 0.97        |
| Short_run_low_grey_level_emphasis3Davg       | -0.54       | -0.99       | -0.93       |
| Grey_level_non_uniformity3Davg               | 0.94        | 0.17        | 0.36        |
| Short_run_low_grey_level_emphasis3Dmrg       | -0.54       | -0.99       | -0.93       |
| Grey_level_non_uniformity3Dmrg               | 0.94        | 0.17        | 0.36        |
| coarseness2Dmrg                              | -0.98       | -0.36       | -0.54       |
| coarseness3D                                 | -0.99       | -0.38       | -0.56       |
| Low_dependence_high_grey_level_emphasis2Dmrg | 0.30        | 0.96        | 0.90        |
| Grey_level_non_uniformity2Dmrg               | 0.92        | 0.15        | 0.34        |
| Grey_level_non_uniformity3Dmrg               | 0.94        | 0.17        | 0.36        |

Table 3: Features outside the random range when the whole dataset is included. Features in bold are the features which are left after eliminating features that are highly correlated to conventional metrics. The feature marked in yellow is left after eliminating mutual correlation of the features.

| Feature name                           | Correlation with MATV | Correlation with SUVMEAN | Correlation with SUVPEAK |
|----------------------------------------|-----------------------|--------------------------|--------------------------|
| int_at_vol_fraction_10                 | 0.25                  | 0.97                     | 0.93                     |
| joint_average2Dvmrg                    | 0.25                  | 1.00                     | 0.91                     |
| sum_average2Dvmrg                      | 0.25                  | 1.00                     | 0.91                     |
| joint_average3Davg                     | 0.24                  | 1.00                     | 0.91                     |
| sum_average3Davg                       | 0.24                  | 1.00                     | 0.91                     |
| joint_average3DWmrg                    | 0.25                  | 1.00                     | 0.91                     |
| sum_average3DWmrg                      | 0.25                  | 1.00                     | 0.91                     |
| <b>Grey_level_non_uniformity2Davg</b>  | <b>0.82</b>           | <b>-0.21</b>             | <b>-0.01</b>             |
| <b>Grey_level_non_uniformity2DWmrg</b> | <b>0.82</b>           | <b>-0.21</b>             | <b>-0.01</b>             |
| Grey_level_non_uniformity2Dvmrg        | 0.92                  | -0.09                    | 0.13                     |
| Run_entropy2Dvmrg                      | 0.44                  | 0.96                     | 0.96                     |
| Low_grey_level_run_emphasis3Davg       | -0.30                 | -0.99                    | -0.89                    |

|                                              |             |              |              |
|----------------------------------------------|-------------|--------------|--------------|
| Short_run_low_grey_level_emphasis3Davg       | -0.38       | -0.98        | -0.91        |
| Grey_level_non_uniformity3Davg               | 0.91        | -0.09        | 0.13         |
| Low_grey_level_run_emphasis3Dmrg             | -0.30       | -0.99        | -0.89        |
| Short_run_low_grey_level_emphasis3Dmrg       | -0.38       | -0.98        | -0.91        |
| Grey_level_non_uniformity3Dmrg               | 0.91        | -0.09        | 0.13         |
| Grey_level_non_uniformity_GLSZM2Dvmrg        | 0.96        | 0.07         | 0.27         |
| coarseness2Dmrg                              | -0.98       | -0.14        | -0.37        |
| coarseness3D                                 | -0.98       | -0.17        | -0.39        |
| Grey_level_non_uniformity_GLDZM2Dmrg         | 0.96        | 0.07         | 0.27         |
| <b>Grey_level_non_uniformity2Davg</b>        | <b>0.82</b> | <b>-0.21</b> | <b>-0.01</b> |
| Low_dependence_high_grey_level_emphasis2Dmrg | 0.15        | 0.97         | 0.90         |
| Grey_level_non_uniformity2Dmrg               | 0.90        | -0.12        | 0.10         |
| Grey_level_non_uniformity3Dmrg               | 0.91        | -0.09        | 0.13         |

**Table 4: Features outside the random range when excluding lesions with MATV<3.2 mL. Features in bold are the features which are left after eliminating features that are highly correlated to conventional metrics. Features marked in yellow are left after eliminating mutual correlated features.**

| Feature name                           | Correlation with MATV | Correlation with SUVMEAN | Correlation with SUVPEAK |
|----------------------------------------|-----------------------|--------------------------|--------------------------|
| int_at_vol_fraction_10                 | 0.10                  | 0.97                     | 0.92                     |
| joint_average2Dvmrg                    | 0.10                  | 1.00                     | 0.90                     |
| sum_average2Dvmrg                      | 0.10                  | 1.00                     | 0.90                     |
| joint_average3Davg                     | 0.10                  | 1.00                     | 0.90                     |
| sum_average3Davg                       | 0.10                  | 1.00                     | 0.90                     |
| joint_average3Dwmrg                    | 0.10                  | 1.00                     | 0.90                     |
| sum_average3Dwmrg                      | 0.10                  | 1.00                     | 0.90                     |
| <b>Grey_level_non_uniformity2Davg</b>  | <b>0.78</b>           | <b>-0.42</b>             | <b>-0.24</b>             |
| <b>Grey_level_non_uniformity2Dwmrg</b> | <b>0.78</b>           | <b>-0.42</b>             | <b>-0.24</b>             |
| <b>Grey_level_non_uniformity2Dvmrg</b> | <b>0.89</b>           | <b>-0.31</b>             | <b>-0.11</b>             |
| Run_entropy2Dvmrg                      | 0.27                  | 0.96                     | 0.95                     |
| Low_grey_level_run_emphasis3Davg       | -0.13                 | -0.99                    | -0.86                    |
| Short_run_low_grey_level_emphasis3Davg | -0.20                 | -0.98                    | -0.87                    |
| <b>Grey_level_non_uniformity3Davg</b>  | <b>0.88</b>           | <b>-0.31</b>             | <b>-0.11</b>             |

|                                              |             |              |              |
|----------------------------------------------|-------------|--------------|--------------|
| Low_grey_level_run_emphasis3Dmrg             | -0.13       | -0.99        | -0.86        |
| Short_run_low_grey_level_emphasis3Dmrg       | -0.20       | -0.98        | -0.87        |
| <b>Grey_level_non_uniformity3Dmrg</b>        | <b>0.88</b> | <b>-0.31</b> | <b>-0.11</b> |
| <b>Grey_level_non_uniformity_GLSZM2Davg</b>  | <b>0.86</b> | <b>-0.17</b> | <b>-0.04</b> |
| Grey_level_non_uniformity_GLSZM2Dvmrg        | 0.94        | -0.14        | 0.04         |
| coarseness2Dmrg                              | -0.96       | 0.05         | -0.16        |
| coarseness3D                                 | -0.98       | 0.02         | -0.19        |
| <b>Grey_level_non_uniformity_GLDZM2Davg</b>  | <b>0.86</b> | <b>-0.17</b> | <b>-0.04</b> |
| Grey_level_non_uniformity_GLDZM2Dmrg         | 0.94        | -0.14        | 0.04         |
| <b>Grey_level_non_uniformity2Davg</b>        | <b>0.78</b> | <b>-0.42</b> | <b>-0.24</b> |
| Low_dependence_high_grey_level_emphasis2Dmrg | 0.04        | 0.97         | 0.91         |
| <b>Grey_level_non_uniformity2Dmrg</b>        | <b>0.87</b> | <b>-0.34</b> | <b>-0.13</b> |
| <b>Grey_level_non_uniformity3Dmrg</b>        | <b>0.88</b> | <b>-0.31</b> | <b>-0.11</b> |

Table 5: Features outside the random range when excluding lesions with MATV<11.48 mL. Features in bold are the features which are left after eliminating features that are highly correlated to conventional metrics. Features marked in yellow are left after eliminating mutual correlated features.

| Feature name                    | Correlation with MATV | Correlation with SUVMEAN | Correlation with SUVPEAK |
|---------------------------------|-----------------------|--------------------------|--------------------------|
| <b>difference_average2Davg</b>  | <b>-0.18</b>          | <b>0.88</b>              | <b>0.84</b>              |
| <b>sum_entropy2Davg</b>         | <b>-0.03</b>          | <b>0.79</b>              | <b>0.76</b>              |
| <b>dissimilarity2Davg</b>       | <b>-0.18</b>          | <b>0.88</b>              | <b>0.84</b>              |
| <b>difference_average2Dmrg</b>  | <b>-0.18</b>          | <b>0.88</b>              | <b>0.84</b>              |
| difference_variance2Dmrg        | -0.13                 | 0.90                     | 0.90                     |
| <b>difference_entropy2Dmrg</b>  | <b>-0.15</b>          | <b>0.83</b>              | <b>0.81</b>              |
| <b>dissimilarity2Dmrg</b>       | <b>-0.18</b>          | <b>0.88</b>              | <b>0.84</b>              |
| joint_average2Dvmrg             | -0.14                 | 1.00                     | 0.87                     |
| difference_variance2Dvmrg       | -0.21                 | 0.90                     | 0.92                     |
| sum_average2Dvmrg               | -0.14                 | 1.00                     | 0.87                     |
| contrast2Dvmrg                  | -0.23                 | 0.92                     | 0.89                     |
| joint_average3Davg              | -0.15                 | 1.00                     | 0.87                     |
| sum_average3Davg                | -0.15                 | 1.00                     | 0.87                     |
| joint_average3Dwmrg             | -0.15                 | 1.00                     | 0.87                     |
| sum_average3Dwmrg               | -0.15                 | 1.00                     | 0.87                     |
| long_runs_emphasis2Davg         | 0.29                  | -0.64                    | -0.57                    |
| Grey_level_non_uniformity2Davg  | 0.68                  | -0.70                    | -0.56                    |
| Grey_level_non_uniformity2Dwmrg | 0.69                  | -0.70                    | -0.55                    |

|                                                |              |              |              |
|------------------------------------------------|--------------|--------------|--------------|
| Grey_level_non_uniformity2Dvmrg                | 0.84         | -0.61        | -0.44        |
| Run_length_variance2Dvmrg                      | 0.34         | -0.81        | -0.71        |
| Run_entropy2Dvmrg                              | -0.04        | 0.95         | 0.91         |
| Low_grey_level_run_emphasis3Davg               | 0.12         | -0.98        | -0.81        |
| Short_run_low_grey_level_emphasis3Davg         | 0.09         | -0.98        | -0.82        |
| Grey_level_non_uniformity3Davg                 | 0.84         | -0.61        | -0.44        |
| Low_grey_level_run_emphasis3Dmrg               | 0.12         | -0.98        | -0.81        |
| Short_run_low_grey_level_emphasis3Dmrg         | 0.09         | -0.98        | -0.82        |
| <b>Grey_level_non_uniformity3Dmrg</b>          | <b>0.84</b>  | <b>-0.61</b> | <b>-0.44</b> |
| <b>Grey_level_non_uniformity_GLSZ M2Davg</b>   | <b>0.77</b>  | <b>-0.47</b> | <b>-0.38</b> |
| <b>Zone_percentage_GLSZM2Davg</b>              | <b>-0.24</b> | <b>0.79</b>  | <b>0.72</b>  |
| Grey_level_non_uniformity_GLSZ M2Dvmrg         | 0.90         | -0.42        | -0.27        |
| <b>Grey_level_non_uniformity_GLSZ M3D</b>      | <b>0.86</b>  | <b>0.12</b>  | <b>0.19</b>  |
| coarseness2Dmrg                                | -0.94        | 0.36         | 0.16         |
| coarseness3D                                   | -0.95        | 0.34         | 0.14         |
| <b>Grey_level_non_uniformity_GLDZ M2Davg</b>   | <b>0.77</b>  | <b>-0.47</b> | <b>-0.38</b> |
| <b>Zone_distance_non_uniformity_GLDZM2Davg</b> | <b>0.72</b>  | <b>0.07</b>  | <b>0.20</b>  |
| <b>Zone_percentage_GLDZM2Davg</b>              | <b>-0.24</b> | <b>0.79</b>  | <b>0.72</b>  |
| Grey_level_non_uniformity_GLDZ M2Dmrg          | 0.90         | -0.42        | -0.27        |
| Zone_distance_non_uniformity_GLDZM2Dmrg        | 0.91         | -0.09        | 0.07         |
| <b>Grey_level_non_uniformity_GLDZ M3D</b>      | <b>0.86</b>  | <b>0.12</b>  | <b>0.19</b>  |
| <b>Grey_level_non_uniformity2Davg</b>          | <b>0.68</b>  | <b>-0.70</b> | <b>-0.56</b> |
| <b>Grey_level_non_uniformity2Dmrg</b>          | <b>0.83</b>  | <b>-0.62</b> | <b>-0.44</b> |
| <b>Grey_level_non_uniformity3Dmrg</b>          | <b>0.84</b>  | <b>-0.61</b> | <b>-0.44</b> |

Table 6: Features outside the random range when excluding lesions with MATV<33.04 mL. Features in bold are the features which are left after eliminating features that are highly correlated to conventional metrics. Features marked in yellow are left after eliminating mutual correlated features.

| Feature name                   | Correlation with MATV | Correlation with SUVMEAN | Correlation with SUVPEAK |
|--------------------------------|-----------------------|--------------------------|--------------------------|
| int_at_vol_fraction_10         | -0.08                 | 0.97                     | 0.90                     |
| <b>sum_entropy2Davg</b>        | <b>0.01</b>           | <b>0.78</b>              | <b>0.76</b>              |
| <b>difference_average2Dmrg</b> | <b>-0.11</b>          | <b>0.87</b>              | <b>0.84</b>              |
| difference_variance2Dmrg       | -0.07                 | 0.89                     | 0.90                     |
| <b>difference_entropy2Dmrg</b> | <b>-0.10</b>          | <b>0.82</b>              | <b>0.80</b>              |
| <b>dissimilarity2Dmrg</b>      | <b>-0.11</b>          | <b>0.87</b>              | <b>0.84</b>              |

|                                                |              |              |              |
|------------------------------------------------|--------------|--------------|--------------|
| joint_average2Dvmrg                            | -0.07        | 1.00         | 0.87         |
| difference_variance2Dvmrg                      | -0.13        | 0.90         | 0.92         |
| sum_average2Dvmrg                              | -0.07        | 1.00         | 0.87         |
| contrast2Dvmrg                                 | -0.14        | 0.92         | 0.90         |
| joint_average3Davg                             | -0.07        | 1.00         | 0.87         |
| sum_average3Davg                               | -0.07        | 1.00         | 0.87         |
| inverse_variance3Davg                          | 0.20         | -0.93        | -0.85        |
| joint_average3DWmrg                            | -0.07        | 1.00         | 0.87         |
| sum_average3DWmrg                              | -0.07        | 1.00         | 0.87         |
| <b>long_runs_emphasis2Davg</b>                 | <b>0.24</b>  | <b>-0.62</b> | <b>-0.56</b> |
| <b>Grey_level_non_uniformity2Davg</b>          | <b>0.61</b>  | <b>-0.70</b> | <b>-0.56</b> |
| <b>Grey_level_non_uniformity2DWmrg</b>         | <b>0.61</b>  | <b>-0.70</b> | <b>-0.56</b> |
| <b>Grey_level_non_uniformity2Dvmrg</b>         | <b>0.80</b>  | <b>-0.61</b> | <b>-0.44</b> |
| <b>Run_length_variance2Dvmrg</b>               | <b>0.26</b>  | <b>-0.81</b> | <b>-0.71</b> |
| Run_entropy2Dvmrg                              | 0.03         | 0.95         | 0.91         |
| Low_grey_level_run_emphasis3Davg               | 0.07         | -0.98        | -0.80        |
| Short_run_low_grey_level_emphasis3Davg         | 0.04         | -0.98        | -0.82        |
| <b>Grey_level_non_uniformity3Davg</b>          | <b>0.80</b>  | <b>-0.61</b> | <b>-0.44</b> |
| Low_grey_level_run_emphasis3Dmrg               | 0.07         | -0.98        | -0.80        |
| Short_run_low_grey_level_emphasis3Dmrg         | 0.04         | -0.98        | -0.82        |
| <b>Grey_level_non_uniformity3Dmrg</b>          | <b>0.79</b>  | <b>-0.61</b> | <b>-0.44</b> |
| <b>Grey_level_non_uniformity_GLSZM2Davg</b>    | <b>0.72</b>  | <b>-0.44</b> | <b>-0.36</b> |
| <b>Zone_percentage_GLSZM2Davg</b>              | <b>-0.16</b> | <b>0.78</b>  | <b>0.72</b>  |
| <b>Grey_level_non_uniformity_GLSZM2Dvmrg</b>   | <b>0.87</b>  | <b>-0.39</b> | <b>-0.25</b> |
| <b>Grey_level_non_uniformity_GLSZM3D</b>       | <b>0.83</b>  | <b>0.20</b>  | <b>0.25</b>  |
| coarseness2Dmrg                                | -0.92        | 0.33         | 0.13         |
| coarseness3D                                   | -0.93        | 0.30         | 0.10         |
| <b>Grey_level_non_uniformity_GLDZM2Davg</b>    | <b>0.72</b>  | <b>-0.44</b> | <b>-0.36</b> |
| <b>Zone_distance_non_uniformity_GLDZM2Davg</b> | <b>0.68</b>  | <b>0.10</b>  | <b>0.23</b>  |
| <b>Zone_percentage_GLDZM2Davg</b>              | <b>-0.16</b> | <b>0.78</b>  | <b>0.72</b>  |
| <b>Grey_level_non_uniformity_GLDZM2Dmrg</b>    | <b>0.87</b>  | <b>-0.39</b> | <b>-0.25</b> |
| <b>Zone_distance_non_uniformity_GLDZM2Dmrg</b> | <b>0.88</b>  | <b>-0.03</b> | <b>0.13</b>  |
| <b>Grey_level_non_uniformity_GLDZM3D</b>       | <b>0.83</b>  | <b>0.20</b>  | <b>0.25</b>  |
| <b>Grey_level_non_uniformity2Davg</b>          | <b>0.61</b>  | <b>-0.70</b> | <b>-0.56</b> |
| <b>Grey_level_non_uniformity2Dmrg</b>          | <b>0.78</b>  | <b>-0.63</b> | <b>-0.44</b> |
| <b>Grey_level_non_uniformity3Dmrg</b>          | <b>0.79</b>  | <b>-0.61</b> | <b>-0.44</b> |

Table 7: Features outside the random range when excluding lesions with MATV<45 mL. Features in bold are the features which are left after eliminating features that are highly correlated to conventional metrics. Features marked in yellow are left after eliminating mutual correlated features.

| Feature name           | Correlation with MATV | Correlation with SUVMEAN | Correlation with SUVPEAK |
|------------------------|-----------------------|--------------------------|--------------------------|
| int_at_vol_fraction_10 | -0.09                 | 0.96                     | 0.90                     |



|                                                  |              |              |              |
|--------------------------------------------------|--------------|--------------|--------------|
| sum_entropy2Davg                                 | -0.13        | 0.71         | 0.80         |
| difference_variance2Dmrg                         | -0.05        | 0.83         | 0.91         |
| <b>difference_entropy2Dmrg</b>                   | <b>-0.15</b> | <b>0.75</b>  | <b>0.82</b>  |
| sum_entropy2Dmrg                                 | -0.13        | 0.72         | 0.80         |
| joint_average2Dvmrg                              | -0.15        | 1.00         | 0.87         |
| difference_average2Dvmrg                         | -0.13        | 0.91         | 0.91         |
| difference_variance2Dvmrg                        | -0.09        | 0.88         | 0.95         |
| sum_average2Dvmrg                                | -0.15        | 1.00         | 0.87         |
| contrast2Dvmrg                                   | -0.12        | 0.90         | 0.92         |
| dissimilarity2Dvmrg                              | -0.13        | 0.91         | 0.91         |
| joint_average3Davg                               | -0.14        | 1.00         | 0.87         |
| sum_average3Davg                                 | -0.14        | 1.00         | 0.87         |
| inverse_variance3Davg                            | 0.18         | -0.91        | -0.92        |
| joint_average3Dwmrg                              | -0.14        | 1.00         | 0.87         |
| sum_average3Dwmrg                                | -0.14        | 1.00         | 0.87         |
| inverse_variance3Dwmrg                           | 0.18         | -0.91        | -0.92        |
| <b>long_runs_emphasis2Davg</b>                   | <b>0.26</b>  | <b>-0.59</b> | <b>-0.65</b> |
| <b>Grey_level_non_uniformity2Davg</b>            | <b>0.44</b>  | <b>-0.82</b> | <b>-0.77</b> |
| <b>Run_percentage2Davg</b>                       | <b>-0.22</b> | <b>0.64</b>  | <b>0.70</b>  |
| Grey_level_non_uniformity2Dwmrg                  | 0.44         | -0.82        | -0.77        |
| Run_percentage2Dwmrg                             | -0.22        | 0.64         | 0.70         |
| <b>Grey_level_non_uniformity2Dvmrg</b>           | <b>0.68</b>  | <b>-0.77</b> | <b>-0.66</b> |
| <b>Run_length_variance2Dvmrg</b>                 | <b>0.23</b>  | <b>-0.82</b> | <b>-0.79</b> |
| Run_entropy2Dvmrg                                | -0.11        | 0.96         | 0.88         |
| Low_grey_level_run_emphasis3Davg                 | 0.16         | -0.98        | -0.81        |
| Short_run_low_grey_level_emphasis<br>3Davg       | 0.15         | -0.98        | -0.81        |
| <b>Grey_level_non_uniformity3Davg</b>            | <b>0.68</b>  | <b>-0.77</b> | <b>-0.67</b> |
| Run_length_non_uniformity3Davg                   | 0.90         | 0.19         | 0.23         |
| Low_grey_level_run_emphasis3Dmrg                 | 0.16         | -0.98        | -0.81        |
| Short_run_low_grey_level_emphasis<br>3Dmrg       | 0.14         | -0.98        | -0.81        |
| <b>Grey_level_non_uniformity3Dmrg</b>            | <b>0.68</b>  | <b>-0.77</b> | <b>-0.67</b> |
| Run_length_non_uniformity3Dmrg                   | 0.90         | 0.19         | 0.23         |
| <b>Grey_level_non_uniformity_GLSZM<br/>2Davg</b> | <b>0.51</b>  | <b>-0.60</b> | <b>-0.57</b> |
| <b>Zone_percentage_GLSZM2Davg</b>                | <b>-0.18</b> | <b>0.73</b>  | <b>0.77</b>  |
| <b>Zone_size_entropy2Davg</b>                    | <b>-0.01</b> | <b>0.46</b>  | <b>0.61</b>  |
| Grey_level_non_uniformity_GLSZM<br>2Dvmrg        | 0.74         | -0.53        | -0.44        |
| Grey_level_non_uniformity_GLSZM<br>3D            | 0.78         | 0.17         | 0.20         |
| coarseness2Dmrg                                  | -0.85        | 0.47         | 0.30         |
| <b>coarseness3D</b>                              | <b>-0.86</b> | <b>0.46</b>  | <b>0.28</b>  |
| small_distance_emphasis_GLDZM2                   | 0.16         | -0.70        | -0.67        |

|                                              |             |              |              |
|----------------------------------------------|-------------|--------------|--------------|
| Davg                                         |             |              |              |
| Grey_level_non_uniformity_GLDZM2Davg         | 0.51        | -0.60        | -0.57        |
| Zone_distance_non_uniformity_GLDZM2Davg      | <b>0.48</b> | <b>0.01</b>  | <b>0.14</b>  |
| Zone_percentage_GLDZM2Davg                   | -0.18       | 0.73         | 0.77         |
| Grey_level_non_uniformity_GLDZM2Dmrg         | 0.74        | -0.53        | -0.44        |
| Zone_distance_non_uniformity_GLDZM2Dmrg      | <b>0.82</b> | <b>-0.12</b> | <b>0.02</b>  |
| Grey_level_non_uniformity_GLDZM3D            | 0.78        | 0.17         | 0.20         |
| Grey_level_non_uniformity2Davg               | 0.44        | -0.82        | -0.77        |
| Dependence_count_entropy2Davg                | -0.03       | 0.58         | 0.67         |
| Low_dependence_high_grey_level_emphasis2Dmrg | -0.15       | 0.96         | 0.92         |
| Grey_level_non_uniformity2Dmrg               | <b>0.67</b> | <b>-0.78</b> | <b>-0.68</b> |
| Dependence_count_non_uniformity2Dmrg         | <b>0.82</b> | <b>0.35</b>  | <b>0.40</b>  |
| Grey_level_non_uniformity3Dmrg               | 0.68        | -0.77        | -0.67        |

Table 8: Features outside the random range when excluding lesions with MATV<133 mL. Features in bold are the features which are left after eliminating features that are highly correlated to conventional metrics. Features marked in yellow are left after

| Feature name     | volume range/ml | Model 1 | Model 2 | Model 3 |
|------------------|-----------------|---------|---------|---------|
| coarseness 2Dmrg | >0              | 0.58    | 0.65    | 0.69    |
|                  | >3.2            | 0.63    | 0.63    | 0.69    |
|                  | >11.49          | 0.62    | 0.61    | 0.72    |
|                  | >33.04          | 0.45    | 0.44    | 0.72    |
|                  | >45.00          | 0.46    | 0.44    | 0.73    |
|                  | >103.94         | 0.44    | 0.467   | 0.73    |
| coarseness 3D    | >0              | 0.61    | 0.67    | 0.68    |
|                  | >3.2            | 0.64    | 0.62    | 0.69    |
|                  | >11.49          | 0.63    | 0.61    | 0.69    |
|                  | >33.04          | 0.46    | 0.45    | 0.73    |
|                  | >45.00          | 0.47    | 0.46    | 0.73    |
|                  | >103.94         | 0.46    | 0.45    | 0.74    |

|                                       |         |          |      |      |
|---------------------------------------|---------|----------|------|------|
| Dependence count non uniformity 2Dmrg | >0      | 0.66     | 0.67 | 0.65 |
|                                       | >3.2    | 0.60     | 0.63 | 0.67 |
|                                       | >11.49  | 0.56     | 0.59 | 0.69 |
|                                       | >33.04  | 0.49     | 0.46 | 0.74 |
|                                       | >45.00  | 0.45     | 0.45 | 0.74 |
|                                       | >103.94 | 0.46     | 0.49 | 0.75 |
| Difference entropy 2Dmrg              | >0      | 0.574514 | 0.65 | 0.71 |
|                                       | >3.2    | 0.511039 | 0.58 | 0.73 |
|                                       | >11.49  | 0.484833 | 0.52 | 0.73 |
|                                       | >33.04  | 0.473556 | 0.45 | 0.73 |
|                                       | >45.00  | 0.498893 | 0.42 | 0.73 |
|                                       | >103.94 | 0.563833 | 0.56 | 0.73 |
| Grey level non uniformity GLDZM 2Davg | >0      | 0.68     | 0.66 | 0.61 |
|                                       | >3.2    | 0.64     | 0.65 | 0.64 |
|                                       | >11.49  | 0.63     | 0.63 | 0.67 |
|                                       | >33.04  | 0.44     | 0.44 | 0.73 |
|                                       | >45.00  | 0.45     | 0.44 | 0.72 |
|                                       | >103.94 | 0.45     | 0.5  | 0.73 |
| Grey level non uniformity GLDZM 3D    | >0      | 0.67     | 0.69 | 0.65 |
|                                       | >3.2    | 0.62     | 0.63 | 0.66 |
|                                       | >11.49  | 0.59     | 0.58 | 0.70 |
|                                       | >33.04  | 0.47     | 0.45 | 0.74 |
|                                       | >45.00  | 0.45     | 0.42 | 0.74 |
|                                       | >103.94 | 0.51     | 0.47 | 0.75 |
| Grey level non uniformity             | >0      | 0.67     | 0.65 | 0.65 |
|                                       | >3.2    | 0.57     | 0.61 | 0.67 |

|                                                   |         |      |      |      |
|---------------------------------------------------|---------|------|------|------|
| GLCM<br>2Davg                                     | >11.49  | 0.49 | 0.55 | 0.70 |
|                                                   | >33.04  | 0.47 | 0.45 | 0.74 |
|                                                   | >45.00  | 0.49 | 0.42 | 0.74 |
|                                                   | >103.94 | 0.60 | 0.57 | 0.76 |
| Grey level<br>non<br>uniformity<br>GLCM<br>2Dmrg  | >0      | 0.66 | 0.66 | 0.59 |
|                                                   | >3.2    | 0.61 | 0.62 | 0.60 |
|                                                   | >11.49  | 0.58 | 0.59 | 0.66 |
|                                                   | >33.04  | 0.44 | 0.46 | 0.74 |
|                                                   | >45.00  | 0.47 | 0.42 | 0.73 |
|                                                   | >103.94 | 0.46 | 0.45 | 0.75 |
| Grey level<br>non<br>uniformity<br>GLCM<br>2Dvmrg | >0      | 0.67 | 0.65 | 0.71 |
|                                                   | >3.2    | 0.64 | 0.63 | 0.73 |
|                                                   | >11.49  | 0.59 | 0.62 | 0.73 |
|                                                   | >33.04  | 0.45 | 0.47 | 0.73 |
|                                                   | >45.00  | 0.45 | 0.43 | 0.73 |
|                                                   | >103.94 | 0.46 | 0.45 | 0.73 |
| Grey level<br>non<br>uniformity<br>GLDZM<br>3Dmrg | >0      | 0.66 | 0.65 | 0.64 |
|                                                   | >3.2    | 0.64 | 0.62 | 0.66 |
|                                                   | >11.49  | 0.59 | 0.60 | 0.70 |
|                                                   | >33.04  | 0.44 | 0.47 | 0.74 |
|                                                   | >45.00  | 0.46 | 0.43 | 0.74 |
|                                                   | >103.94 | 0.46 | 0.46 | 0.75 |
| Long runs<br>emphasis<br>GLRLM<br>2Dmrg           | >0      | 0.48 | 0.65 | 0.71 |
|                                                   | >3.2    | 0.47 | 0.59 | 0.73 |
|                                                   | >11.49  | 0.49 | 0.53 | 0.74 |
|                                                   | >33.04  | 0.57 | 0.50 | 0.74 |

|                                       |                                     |       |       |      |
|---------------------------------------|-------------------------------------|-------|-------|------|
|                                       | >45.00                              | 0.59  | 0.47  | 0.74 |
|                                       | >103.94                             | 0.59  | 0.55  | 0.74 |
| Run length non uniformity GLRLM 3Dmrg | >0                                  | 0.68  | 0.67  | 0.61 |
|                                       | >3.2                                | 0.63  | 0.62  | 0.64 |
|                                       | >11.49                              | 0.60  | 0.61  | 0.71 |
|                                       | >33.04                              | 0.46  | 0.46  | 0.75 |
|                                       | >45.00                              | 0.47  | 0.43  | 0.75 |
|                                       | >103.94                             | 0.46  | 0.47  | 0.75 |
|                                       | Run length variance GLRLM 2Dvmrg    | >0    | 0.49  | 0.65 |
| >3.2                                  |                                     | 0.49  | 0.60  | 0.72 |
| >11.49                                |                                     | 0.47  | 0.52  | 0.73 |
| >33.04                                |                                     | 0.51  | 0.46  | 0.73 |
| >45.00                                |                                     | 0.50  | 0.42  | 0.73 |
| >103.94                               |                                     | 0.57  | 0.56  | 0.76 |
| Run percentage GLRLM 2Dmrg            |                                     | >0    | 0.48  | 0.65 |
|                                       | >3.2                                | 0.47  | 0.58  | 0.73 |
|                                       | >11.49                              | 0.48  | 0.51  | 0.73 |
|                                       | >33.04                              | 0.559 | 0.48  | 0.73 |
|                                       | >45.00                              | 0.58  | 0.44  | 0.73 |
|                                       | >103.94                             | 0.61  | 0.55  | 0.73 |
|                                       | Small distance emphasis GLDZM 2Davg | >0    | 0.66  | 0.67 |
| >3.2                                  |                                     | 0.60  | 0.61  | 0.64 |
| >11.49                                |                                     | 0.49  | 0.55  | 0.67 |
| >33.04                                |                                     | 0.46  | 0.47  | 0.73 |
| >45.00                                |                                     | 0.47  | 0.435 | 0.73 |
| >103.94                               |                                     | 0.47  | 0.51  | 0.74 |

|                                          |         |      |      |      |
|------------------------------------------|---------|------|------|------|
| Zone distance non uniformity GLDZM 2Davg | >0      | 0.64 | 0.68 | 0.62 |
|                                          | >3.2    | 0.62 | 0.61 | 0.64 |
|                                          | >11.49  | 0.63 | 0.60 | 0.67 |
|                                          | >33.04  | 0.49 | 0.47 | 0.73 |
|                                          | >45.00  | 0.49 | 0.45 | 0.73 |
|                                          | >103.94 | 0.45 | 0.42 | 0.74 |
| Zone distance non uniformity GLDZM 2Dmrg | >0      | 0.66 | 0.67 | 0.70 |
|                                          | >3.2    | 0.64 | 0.63 | 0.72 |
|                                          | >11.49  | 0.60 | 0.58 | 0.72 |
|                                          | >33.04  | 0.46 | 0.49 | 0.72 |
|                                          | >45.00  | 0.45 | 0.44 | 0.73 |
|                                          | >103.94 | 0.45 | 0.55 | 0.73 |
| Zone distance non uniformity GLDZM 2Davg | >0      | 0.47 | 0.66 | 0.63 |
|                                          | >3.2    | 0.48 | 0.59 | 0.65 |
|                                          | >11.49  | 0.48 | 0.55 | 0.67 |
|                                          | >33.04  | 0.49 | 0.46 | 0.73 |
|                                          | >45.00  | 0.51 | 0.43 | 0.73 |
|                                          | >103.94 | 0.59 | 0.57 | 0.74 |
| Zone size entropy GLDZM 2Davg            | >0      | 0.67 | 0.66 | 0.71 |
|                                          | >3.2    | 0.62 | 0.62 | 0.73 |
|                                          | >11.49  | 0.56 | 0.52 | 0.73 |
|                                          | >33.04  | 0.53 | 0.51 | 0.73 |
|                                          | >45.00  | 0.53 | 0.48 | 0.73 |
|                                          | >103.94 | 0.56 | 0.56 | 0.73 |

Table 9: Mean AUC of Model 1 and 2, AUC of Model 3 for different features

**Mean AUC using random upsampling of the minority class vs. SMOTE**

Results random upsampling

Results SMOTE

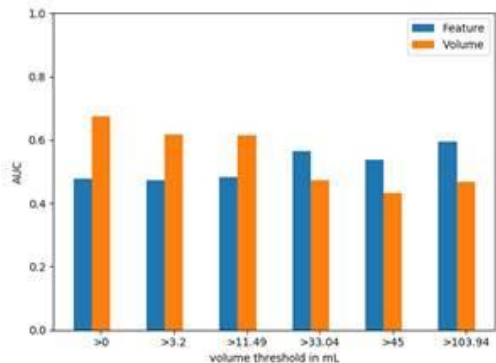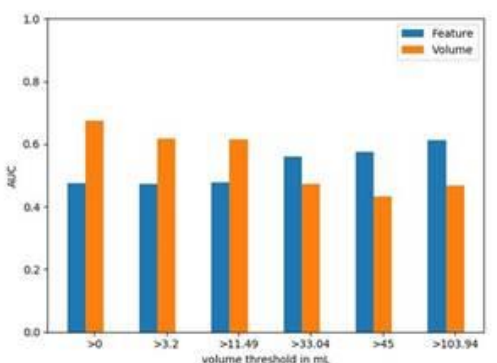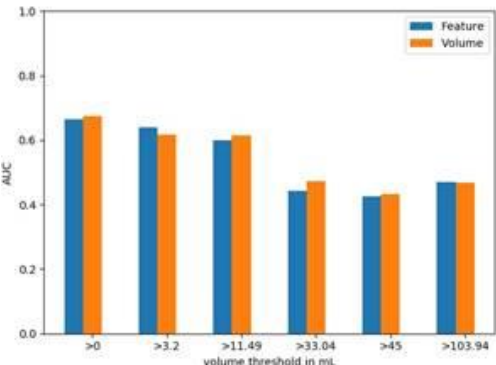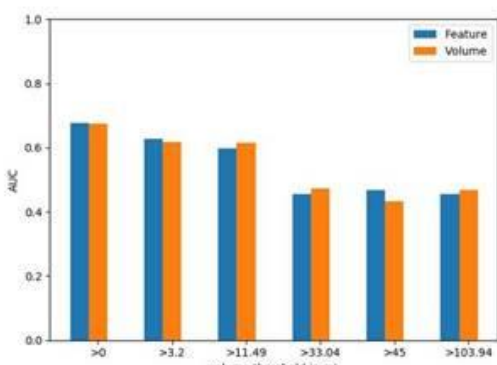

Supplemental Figure 2: Mean AUC of the feature run percentage (upper row) achieved by using random upsampling of the majority class (left) vs. SMOTE (right), and mean AUC of the feature run length non uniformity (lower row) w
